# Supplementary material
Source: PubMed Central journal article supplement (PMC3095935)
Supplement: supp_44_3_341__1.pdf [file supp_44_3_341__1.pdf]

## Online Data Supplement

### **Regulatory T cells Contribute to Allergen Tolerance Induced by Daily Airway Immunostimulant Exposures**

Steve M. Lee<sup>1</sup>  
Glenda Batzer<sup>1</sup>  
Nicholas Ng<sup>1</sup>  
Diane Lam<sup>1</sup>  
Sundeep S. Pattar<sup>1</sup>  
Neal D. Patel<sup>1</sup>  
Anthony A. Horner<sup>1,2</sup>

**Institutions:** Departments of Medicine<sup>1</sup> and Pediatrics<sup>2</sup>, University of California, San Diego.
