# Supplementary material
Source: PubMed Central journal article supplement (PMC3095935)

**A**

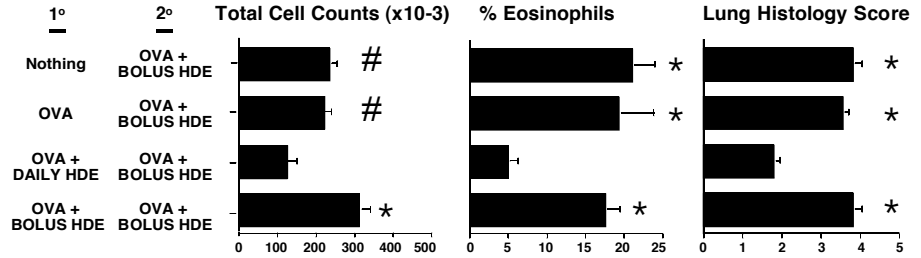

**1° Immunization**

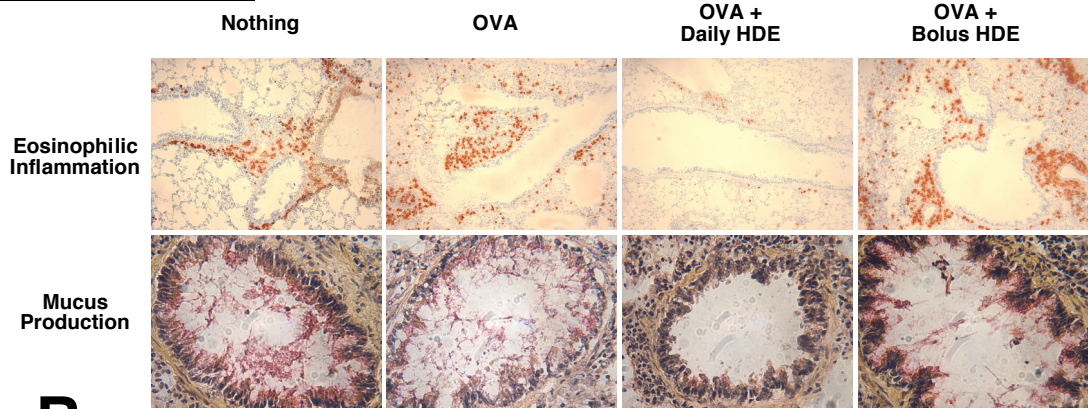

**B**

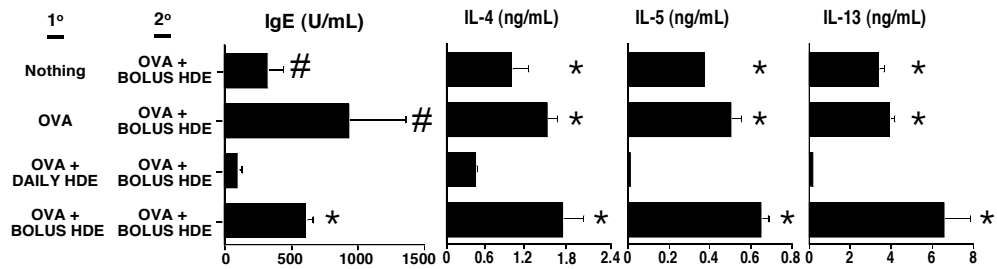

**Supplemental Figure 1**

Supplement: supp_44_3_341__2.pdf [file supp_44_3_341__2.pdf]

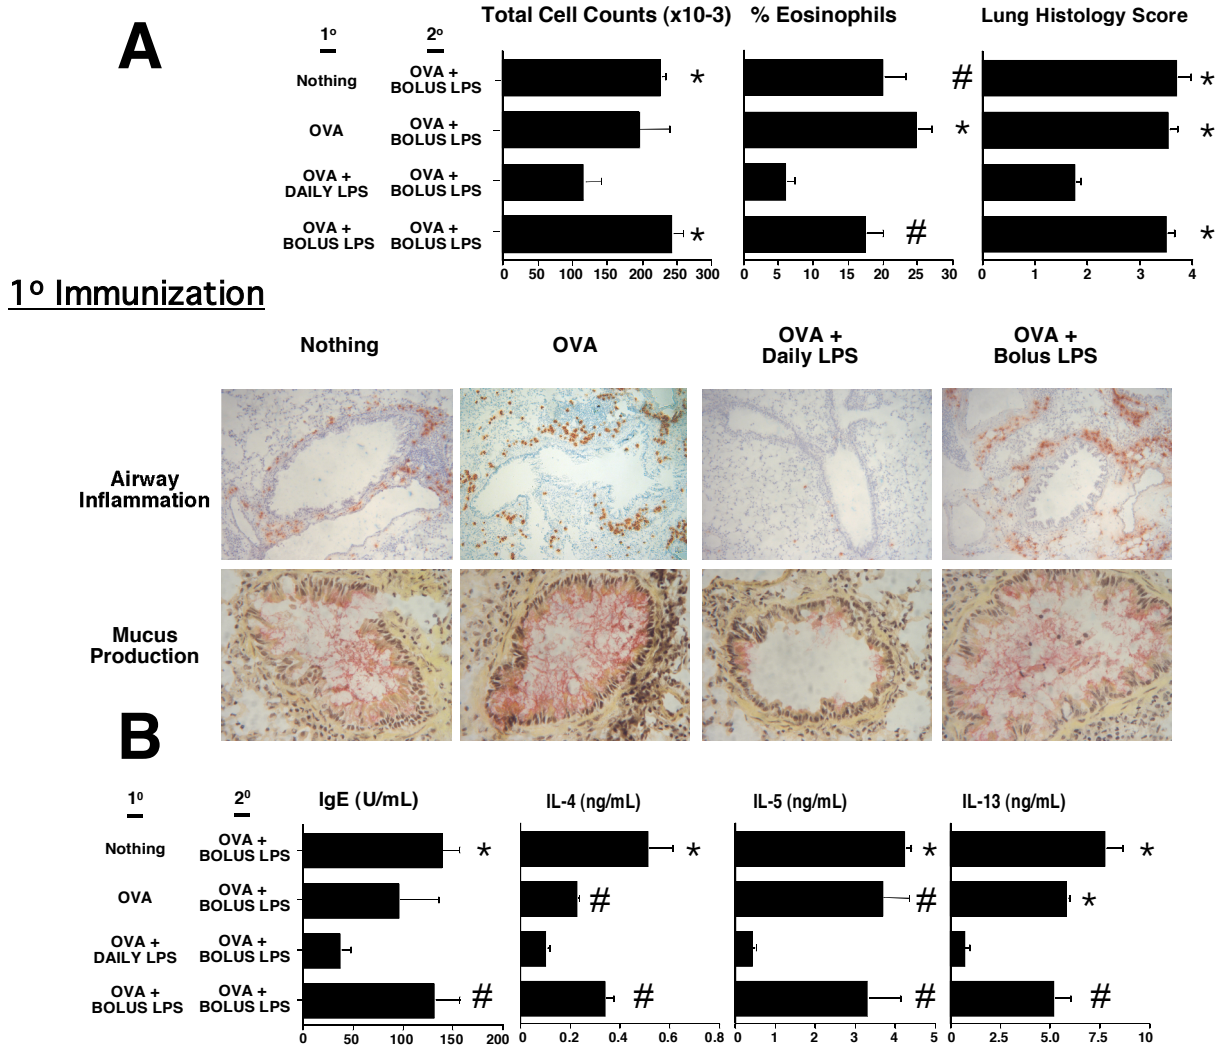

**Supplemental Figure 2**

Supplement: supp_44_3_341__3.pdf [file supp_44_3_341__3.pdf]
